# Supplementary material for: Multivariate linear regression analysis to identify general factors for quantitative predictions of implant stability quotient values
Source: PLoS One. 2017 Oct 30;12(10):e0187010. doi: 10.1371/journal.pone.0187010 (PMC5662232; doi:10.1371/journal.pone.0187010)
Supplement: S1 File — Excel file to record all the collected data of the included patients. (XLSX) [file pone.0187010.s001.xlsx]

## Sheet: database for group1
patient number	male	female	tooth number	bone type	immediate	delay	bone graft	torque	anterior teeth	premolar	molar	T1	T2	T1 ISQ				T2 ISQ				I stage labeled yes	implant
														m	d	b	l	m	d	b	l		diameter	length
1	√		46	1		√		30			√	14.4.21	14.8.22	82	85	82	85	83	85	83		yes	4	9
			47	1		√		30			√	14.4.21	14.8.23	75		80	75	75		81	75		4	11.5
2		√	13	3		√		50	√			12.11.2	13.3.13	81	81	76	81	81	80	80	80		3.5	13
			14	4		√		50		√		12.11.2	13.3.13	79	79	73	79	76	76	76	76	yes	3.5	13
			16	4		√		10			√	12.11.2	13.3.13	66	66	65	66	74	74	75	74		3.5	13
3		√	35	3		√				√		14.2.5	14.7.6	79		70	70	80		71	76		4	11.5
4	√		23	4		√		15	√			14.2.20	14.4.15	71	71	69	69	73	73	73	76		4.2	14.5
5	√		14	2		√		30		√		12.12.24	13.5.25	80	80	79	79	74	74	73	73	yes	4	13
6	√		22		√			25	√			13.5.11			68	63	63						4	14.5
7	√		36	2		√		50			√	14.4.12		78	78	73	78						5	11.5
8	√		46			√					√	13.12.29	14.4.29	80	79	81	82	80	79	81	82		4	11.5
9		√	23	1		√			√			13.12.16	14.4.16	75	75	76	76	75	75	76	76		4	13
10		√	46	1	√			50			√	13.11.1	14.2.18	78	78	78	70	78	78	78	70		5	9.5
11	√		46	1	√						√	13.9.26	14.1.20	69	69	72	71	74	72	72	71	yes	4	13
12		√	46	4		√					√	14.3.12	14.5.12	81		81	81	83		81	81	yes	4	11.5
13		√	45		√					√		13.4.26	13.9.22	66	65	64	66	73	73	74	73		4	11.5
			46			√					√	13.4.26	13.9.22	75		74	75	78		78	78		4	9.5
14		√	41	1		√	yes	30	√			14.3.3	14.6.8	74	75	70	74	78	75	70	74		3.5	13
			31	1		√		30	√			14.3.3	14.6.8	78	77	79	77	78		79	77		3.5	13
15	√		21	4		√			√			13.11.18	15.10.24	72	55	56	55	74	74	81	74		4	13
16	√		14	1	√			30		√		13.9.18	14.2.13	70	72	72	72	79	79	80	80	yes	4	11.5
17	√		35	4		√		35		√		14.3.19.	14.11.4	69		69	69	85		82	85		4	9.5
			36	4		√		50			√	14.3.19.	14.11.4	83		83	75	80		80	80		4	9.5
			37	4		√		50			√	14.3.19.	14.11.4	76		85	75	70		70	70		4	9.5
18		√	36	4		√		30			√	13.11.20	14.1.16	80		80	80	80	80	80	80	yes	4	13
19	√		47	3		√		50			√	14.5.9	14.11.9	76		79	81	76		79	81	yes	4.5	9.5
			36	3		√		50			√	14.5.9	14.11.10	80		85	80	80		85	80	yes	5	9.5
20		√	36	2	√		yes	30			√	13.11.18		62		62	62	74		75	78	yes	5	11.5
21		√	16	4		√		50			√	13.11.1	14.2.14	81		84	85					yes	5	11.5
22	√		47	4		√		20			√	14.3.22	14.6.7	73		70	72	79		70	72		4	9.5
			36	4		√		30			√	14.3.22	14.6.7	72		79	72	72		79	72		4.5	9.5
			35	4	√			30		√		14.3.22	14.6.7	77		77	78	77		80	78		4	9.5
23		√	21	4	√		yes	20	√			14.3.18	14.6.5	71	71	61	61	71	71	75	78		4.5	9.5
24	√		46	4		√		30			√	14.1.4	14.5.4	70	75	75	75					yes	4	11.5
25		√	25			√		35		√		14.4.3	14.10.3	75	75	73	75					yes	4	13
26		√	36	3		√		28			√	13.12.24	14.2.27	69	69	70	69	76	80	80	80		4	11.5
27		√	42	2		√		30	√			14.4.28	14.10.28	68	70	69							3.5	13
28		√	46	1		√		50			√	13.3.7	13.6.24	82	81	81	81	85	85	86	87		5	9.5
			35	1	√			50		√		13.7.17	13.8.28	78		78	77	74		72	74	yes	4	9.5
			37	1		√		40			√	13.7.17	13.8.28	80		80	75	82		82	82	yes	5	9.5
29	√		12	2	√			15	√			13.4.26	13.8.29	72	72	72	73	70	70	67	67		3.5	13
30	√		16	3	√			40			√	12.11.14	13.5.15	71	71	72	71	70	70	70	67		4	13
			17	3		√		40			√	12.11.14	13.5.16	74	76	76	76	70	70	70	67		4	13
			15	3		√		50		√		12.11.14	13.5.17	71	70	71	71	70	70	70	67		4	13
31	√		14	3		√		20		√		13.9.14		59	59	59	59	78	79		79		4	9.5
			15	3		√		20		√		13.9.14		48	48	48	48	80	80	81	81		4	9.5
32	√		42	1		√		30	√			14.4.26	14.9.26	75	67	67	75	78	79	79	79		4	13
			32	1		√		30	√			14.4.26	14.9.27	76		75	66	80	80	81	81		4	13
			34	1		√		35		√		14.4.26	14.9.28	75	67	73	73	82	81	83	83		4.5	13
33		√	46			√		30			√	12.11.5	13.2.25	82	82	85	85	86	86	86	86		5	9.5
34	√		26	3		√		25			√	14.4.20	14.6.5	79		78	72					yes	4.5	9.5
			27	3		√		30			√	14.4.20	14.6.5	85		81	81	86	86	86	86		4.5	9.5
35	√		46	2	√		yes				√	13.8.9	14.2.9	64	64	70	70	71	71	71	71	yes	5	11.5
36	√		36	4		√		20			√	13.7.18	13.12.11	64		64	70	72	75	75	75		4	11.5
37	√		15		√			25		√		14.3.31		72		70	70	73	73	73	70	yes	4	13
38		√	46	4		√		45			√	13.6.26	13.9.5	74		74	74	74	74	74	74		4	11.5
			36	4		√		50			√	13.6.26	13.9.6	79		80	79	80	80	80	80		4	11.5
39		√	46	4		√		40			√	14.3.26	14.9.26	78		78	78						4	9.5
			37	4		√	yes	50			√	14.4.15	14.5.30	73		66	65	77	77	78	77		4	9.5
			36	1		√	yes	70			√	14.4.15	14.5.30	73		70	74	71	71	71	71		4	9.5
			47	1		√		20			√	14.3.26	14.7.10	75		76	75						4	9.5
40		√	32	3		√		50	√			14.8.27	14.12.15	66	66	66	66	72	71	76	73		3.5	11.5
41	√		31	3		√	yes	20	√			14.3.14	14.5.29	69	63	62	69	72	71	70	73		3.5	13
			41	3		√	yes	30	√			14.3.14	14.5.29	69	70	71	69	72	70	71	72		3.5	13
42	√		25	3	√			20		√		13.11.3		64	64	64	64						4	13
43		√	36	3		√		30			√	13.11.20	14.5.10	83	77	83	77	75	75	75	75		4	11.5
44	√		21	4		√	yes	40	√			13.5.22	13.7.4	71		71	71	68	68	64	64		4	13
45	√		25	4		√		30		√		13.4.12	13.7.15	80	81	81	80	75	76	75	76	yes	4	9.5
46		√	36	1	√			50			√	13.5.17		84		80	84					yes	5	11.5
47	√		32	1		√		35	√			13.6.14		68	68	68	68	83	83	83	83		4	13
			42	1		√		50	√			13.6.14	13.12.14	74	74	74	74	77	77	77	77		4	13
48	√		12	3	√		yes	50	√			13.11.26		75	76	75	75					yes	4	13
49	√		47	2		√		35			√	13.10.19	14.2.6	84		82	85	83		77	83		5	11.5
50	√		46	3		√		50			√	13.12.13	14.2.28	78		77	78	76	76	76	76		5	9.5
			17	3	√			25			√	13.12.13	14.6.13			76	70	72	72	70	72		5	13
51		√	36	1	√			30			√	14.3.13	14.5.30	74		74	74	78	78	78	78	yes	4	9.5
52		√	21	4		√		25	√			13.6.11	13.8.13	80	80	77	80	75	75	75	75	yes	3.5	13
53	√		13	4	√		yes	10	√			14.2.25	14.8.25	43	43	43	43	77	77	78	77		4	13
54		√	46	2		√		35			√	14.8.11	15.2.11	72		72	72	71	71	71	71		4	9.5
55	√		46	3		√		70			√	13.12.9	14.4.2	78		80	78	80		82	80		4.5	11.5
56	√		36	1		√		30			√	13.8.17	13.11.16	76		80	76	81	81	81	81	yes	4	9.5
			37	1		√		30			√	13.8.17	13.11.16	83		83	77	77	77	78	77	yes	4	9.5
57		√	23		√		yes	30	√			12.11.17	13.2.23	70	71	64	66	71	71	71	71		4	13
58		√	24	1	√		yes	30		√		14.8.30	15.12.15.	70	70	70	70	76	76	75	76		4	11.5
59	√		35	3		√		30				14.1.17	14.5.1	74	78	78	80	79	78	79	79		4	9.5
			27	4		√		10			√	14.1.17	14.5.1	71		65	65	82	80	83	82		4.5	11.5
60	√		46	1		√		50			√	13.10.11	13.12.11	71	83	71	82	85	85	81	85		5	9.5
			36	1		√		50			√	13.10.11	13.12.11	78		73	78	80		80	80		5	9.5
			47	1		√		50			√	13.10.11	13.12.11	83		82	83	84		84	84		4	11.5
61	√		14	2	√			35		√		14.5.9	14.2.14	73	73	73	73	76	76	75	76	yes	4	14.5
62	√		21	3	√			35	√			14.1.8	14.3.13	77	77	74	74	79	78	79	79		4	13
			41	2	√			15	√			14.1.8	14.3.14	76	76	71	76	76	76	75	76		3.5	13
			32	2		√		50	√			14.1.8	14.3.15	75	75	70	76	79	78	79	79		3.5	13
63	√		46			√		25			√	13.5.11	13.9.12	80		80	80	76	76	75	76	yes	4	11.5
			45			√		35		√		13.5.11	13.9.12	74		78	74	79	78	79	79	yes	4	11.5
64		√	21	3		√		35	√			14.5.12	14.7.27	81	81	77	77	76	76	75	76	yes	4	13
65	√		46	1	√			50			√	14.5.22	14.8.7	70		64	70	79	78	79	79		4	9.5
			47	3	√			30			√	14.5.22	14.8.8	74		72	71						4.5	7.5
66	√		35	2		√		30		√		14.3.12	14.5.30	78		84	84	75	75	85	85	yes	4	9.5
67		√	42	2		√		30	√			14.3.9	14.5.17	81	81	83	83	81	81	83	83		4	13
			32	2		√		30	√			14.3.9	14.5.17	81	80	81	82	81	80	81	82		4.5	13
68		√	36	3		√		50			√	13.6.29	13.12.29	84		84	83	81		84	83		4	9.5
69		√	36	4		√					√	13.3.13	13.9.13	86		85	85	86		80	85		5	11.5
70		√	46	1	√			30			√	13.8.9	14.2.8		84	85	84	84	84	84	84		5	9.5
			47	1	√			25			√	13.8.9	14.2.8	75		80	75	79		79	84		5	9.5
71		√	46	4		√		10			√	13.11.20	14.2.24		73	74	76	69	72	72	72		4	13
72	√		11	2		√	yes	50	√			14.2.6	14.4.21	69	69	69	69						4	11.5
			15	1		√		35		√		14.2.6	14.4.21	75	75	76	75	75	75	75	76		4	11.5
			13	4		√		25	√			14.2.6	14.4.21	75	75	75	76	80		81	81		4	13
73		√	47	3		√		35			√	13.7.3	13.7.18	80		81	81	81		84	81		4	11.5
			46	3		√		40			√	13.7.3	13.7.18	81		84	81	73		82	74	yes	4	11.5
74		√	36		√			30			√	13.12.26	14.9.20	73		82	74					yes
75		√	36	3		√		30			√	13.4.10	13.5.30	74	74	74	74	76	76	75	76	yes	4	9.5
76		√	46		√			50			√	14.5.18	14.8.16	70	80	81	81	71	81	81	81		4.5	9.5
77	√		35	4	√			30		√		14.2.26	14.9.30	59		51	51						4	9.5
78	√		15	4		√		30		√		13.9.5	13.12.20	80	80	80	80	80	80	80	80	yes	4	11.5
79	√		14	4		√		30		√		13.2.28	13.5.31	77	77	77	78	76	77	77	77		4	13
			46	2		√		50			√	13.2.28	13.5.31	86	86	86	86	86	86	86	86		5	11.5
			24	4		√		30		√		13.7.1	13.8.30	71	71	71	72	72	72	71	74		4	9.5
			26	4		√		30			√	13.7.1	13.8.30	73	76	75	75	75	75	70	70		4	11.5
			37	4		√		50			√	13.7.1	13.8.30	85	84	84	85	75	75	80	80		5	9.5
80		√	36	4	√			50			√	13.11.13	14.3.1	85		80	80	79		80	79	yes	5	11.5
			37	4		√		30			√	13.11.13	14.3.1	81		83	83	77		77	77	yes	4	11.5
81	√		36			√		50			√	14.1.16	14.6.16	75		75	82						4	9.5
			34		√			25		√		14.1.16	14.6.17	72		70	72						4	11.5
82	√		32	1		√		50	√			14.3.21	14.8.15	77	77	70	70	80	80	78	80		4	13
			33	1	√			70	√			14.3.21	14.8.15	71	71	69	73	81	81	80	81		4	11.5
			35	1		√		60		√		14.3.21	14.8.15	75		75	80	79		79	80		4.5	11.5
			37	2		√		50			√	14.3.21	14.8.15	73		67	74	80		80	80		4	11.5
			23	4		√		40	√			14.4.18	14.8.16	76	77	77	77	81	81	80	81		4	13
			25	4		√		30		√		14.4.18	14.8.17	70	70	70	70	79		79	80		4	13
			26	4		√		30			√	14.4.18	14.8.18	64		64	64	80		80	80		4.5	11.5
			27	4		√		30			√	14.4.18	14.8.19	70		63	63						4.5	9.5
83	√		15	4	√			35		√		13.12.2	14.3.13	73	73	73	73	79	79	78	79	yes	4.5	9.5
84		√	26	4		√		30			√	14.6.6	15.3.10	75		73	73						4	9.5
85	√		46	4		√		30			√	13.8.14	13.11.20	86	86	86	86	78	78	82	79	yes	4	11.5
86	√		47	2	√			30			√	13.1.25	13.5.20.	80		80	80	83	77	83	83	yes	4	11.5
87	√		14	4	√			40		√		13.7.5	13.11.12	69	69	69	69	75	75	75	75		4	13
88		√	16	2	√		yes	15			√	13.1.11	13.10.5	60	70	60	70	80		70	80		5	9.5
89	√		16	3	√			30			√	15.4.3	15.8.6	79		72	79	80		80	80		4	9.5
			36	2		√		50			√	15.4.3	15.8.6	80		81	80	74		75	74		4	9.5
90		√	36	4		√		30			√	13.12.20	14.6.20	83		81	83						4	11.5
			37	4		√		15			√	13.12.20	14.6.21	80		77	80	80		77	80		4	11.5
91	√		35			√		50		√		13.11.28	14.5.29	81	75	75	80	81	78	78	80		4.2	14.5
			32			√		50	√			13.11.28	14.5.30	80	80	77	80	80	80	77	80		4	13
			42			√		70	√			13.11.28	14.5.30	75	75	71	75	80	80	78	75		4	13
			45			√		50		√		13.11.28	14.5.30	77	76	76	74	77	76	76	74		4	11.5
92	√		14			√		40		√		14.2.2	14.5.7	80	80	73	73	80	80	73	73		4	11.5
			13			√		30	√			14.2.2	14.5.7	75	75	75	71	75	75	75	71		4	9.5
			11			√		40	√			14.2.2	14.5.7	77	77	71	77	77	79	80	77		4	9.5
			47			√		30			√	14.4.19	15.11.29	81		82	81	81		82	81		4	9.5
93		√	46	4		√		35			√	13.5.11	13.10.11	74	84	84	84	74	84	84	84		4	9.5
			45	4		√		30		√		13.5.11	13.10.12	81	75	75	75	81	75	75	75		4	9.5
94	√		22	4	√			35	√			14.1.3	14.6.3	72	73	70	72	72	73	70	72		4	13
			11	3	√		yes	50	√			14.1.3	14.6.4	70	70	70	70	70	70	70	70		4	13
95	√		47	4	√			30			√	13.11.16	14.2.30	81		80	81	85	84	86	84		5	11.5
96	√		16	3	√			50			√	14.4.19	15.2.7	71		78	79	86		85	84		5	9.5
97	√		36	4		√		30			√	13.11.2	14.1.4	77		78	77	77	76	77	77	yes	4	11.5
98	√		46	1		√		50			√	14.9.19	15.3.19		74	75	75		77	76	77		4.5	7.5
			47	1		√		35			√	14.9.19	15.3.29	72		68	67	74	75	75			4	9.5
99	√		22		√		yes		√			13.9.11	14.4.24	75	75	75	74	85	85	85	80		4.2	14.5
100		√	46			√					√	14.1.5	14.4.20	80	80	75	80	78	78	78	78		4	9.5
101	√		36	1		√		30			√	14.4.28	15.3.5	71		71	71	78	78	78	78	yes	4.5	9.5
102		√	35		√			15		√		14.2.26	14.8.26	74		71	74	71		71	78		4	11.5
			37		√			15			√	14.2.26	14.8.26	69		66	60	74		71	74		5	9.5
103	√		31		√			30	√			13.9.21	13.11.10	69	69	70	68	71	72	74	74
104		√	26	4	√			25		√		15.4.18	15.8.8	70		72	73	82		84	85		5	9.5
			46	4		√		50			√	15.4.18	15.8.8	83		83	83	85		82	85		4	9.5
			47	4		√		25			√	15.4.18	15.8.8	82		82	82	70		70	70		4.5	9.5
105	√		46			√		30			√	13.1.9	13.4.24	72		75	75	81		82	81
106		√	22	3		√	yes	35	√			13.5.9	13.11.9	74	74	74	74
107	√		26	4		√		50			√	15.2.5		76		78	76	75	75	75	75		4.5	9.5
108	√		42	2	√			50	√			15.4.8	15.8.1	78	75	75	77	81	79	78	80	yes	4	13
			33	2	√			50	√			15.4.8	15.8.1	73	74	75	73	79		75	79	yes	4	13
			44	2	√			35		√		15.4.8	15.8.1		66	66	66		75	79	75	yes	4.5	11.5
			46	2		√		40			√	15.4.8	15.8.1	80		78	79	78		81	81	yes	4.5	11.5
109	√		34	1	√					√		13.9.18		61	61	46	46	75	75	76	76
			32	1		√			√			13.9.18		67	72	68	72	73	73	72	72
			42	1		√			√			13.9.18	13.12.23	70	70	73	72	74	71	71	74
110	√		36	2		√		30			√	13.9.13	14.3.13	75		75	75					yes	4	11.5
111	√		41	2		√		20	√			13.5.11	13.9.2	71	68	68	71	75	74	71			3.5	13
112	√		36	1		√		50			√	14.6.5	14.12.5	70		80	71	80	80	80	80	yes	4	9.5
			37	1		√		50			√	14.6.5	14.12.6	79		85	79	73	73	72	72	yes	4.5	9.5
113	√		24	2		√		50		√		13.3.30	13.7.3	81	81	81	81	80	80	80	80	yes	4	11.5
114	√		37	3	√		yes	30			√	13.12.6	15.3.6	59		57	60	78		75	75		4.5	11.5
115		√	36	3		√		25			√	13.9.25		75		75	75	77		78	78		4	11.5
116	√		36		√		yes	20			√	13.8.30	14.4.30	57	57	60	60	78	75		78		4	11.5
117	√		11	1		√		70	√			13.3.29	13.9.21	82		80	79	86		86	86	yes	5	13
118	√		11	1		√	yes	35	√			14.4.7	14.9.7	66	66	67	66	78	75		78		4	13
			21	1		√		50	√			14.4.7	14.9.7	77	78	78	78	77	78	78	78		4	13
119		√	46		√			30				14.4.11	14.9.11	77	77	78	77	77	77	78	77	yes	4	9.5
120	√		46	3		√		25			√	13.9.22	14.2.23		59	59	60		68	71	70		5	9.5
			47	3		√		25			√	13.9.22	14.2.24	70		70	73	70		70	73		5	9.5
121		√	46	3		√		30			√	13.11.13	14.9.5	83		82	84	83		82	84
			47	2		√		30			√	13.11.13	14.9.6	78		75	78	78		75	78
			44	1		√		50		√		13.11.13	14.9.7		70	70	70		80	78	78
			36	3		√		30			√	13.11.13	14.9.8	85		85	85	85		85	85
			37	1		√		50			√	13.11.13	14.9.9	78		78	78	78		78	78
			34	1		√		30		√		13.11.13	14.9.10	75		78	75	75		78	75
			16	4		√		10			√	13.11.13	14.9.11	43		41	44	64	64	64	64
			15	4		√		20		√		14.4.18	14.9.11	64	64	65	64	75	75	75	75
			13	3		√		50	√			14.4.18	14.9.11	70	70	72	70	81	80	78	81
			11	1		√		60	√			14.4.18	14.9.11	73	74	73	73	61	61	61	61
			21	1		√		30	√			14.4.18	14.9.11	75	75	64	64	62			62
			24	3		√		30		√		14.4.18	14.9.12	70	70	71	70
			25	4		√		20		√		14.4.18	14.9.11	62	63	62	62	76	76	76
			26	3		√		15			√	14.4.18	14.9.11	62	62	57	57	78	78	71
122	√		37	3	√			30			√	13.4.11	13.6.26	85	80	82	84	80	81	84	84		5	11.5
123		√	21			√		50	√			14.8.23	15.6.18	70		66	67	79	70	70	70		4	13
124		√	14	4		√		40		√		13.11.15	14.2.26	79	79	75	79	79	79	75	79	yes	4	11..5
125		√	31	1		√		45	√			13.12.11	14.2.27	80		71	71	77	77		70	yes	4	13
			36	1		√		50			√	13.12.11	14.2.27	75		82	75	81	81	81	80	yes	4	9.5
			34	2		√		35		√		13.12.11	14.2.27		77	76	77		83	82	82	yes	4	9.5
126		√	36	4		√		50			√	13.11.30	14.6.30	75		75	71	75		75	71	yes	4	9.5
			37	4		√		30			√	13.11.30	14.6.30	76		76	76	80		76	76	yes	4	9.5
			26	4		√		30			√	13.12.21	14.3.22	71		65	67	62	65	66	63		4	13
			27	4		√		30			√	13.12.21	14.3.22	73		73	73	69		69	69		4	11.5
127	√		47	1	√			30			√	13.12.11	14.2.23	79		78	79	79		80	80	yes	5	11.5
128	√		27		√			30			√	13.10.14		75		74	74	81	81	80	80	yes	5	11.5
129	√		17	1	√			50			√	13.9.12	13.12.11	85	75	85	75	81	81	79	78	yes	5	11.5
130	√		21	4		√		30	√			14.3.11	14.5.14	72	71	72	71	77	77	77	77	yes	4	13
131		√	34	4	√			20		√		13.4.24	13.9.28	78	79	77	79	82	82	80	82	yes	3.5	13
132		√	46	3	√			25			√	14.1.19	14.7.19	80	80	76	76	80	80	76	76		4	11.5
133	√		11		√			50	√			14.2.26	14.8.26	71	71	71	71	80	80	76	76		3.5	13
134		√	24	4		√		20		√		14.3.20	14.9.20	75	75	75	75	75	75	75	75		3.5	11.5
			21	4	√			35	√			14.3.20	14.9.20	77	75	75	75	77	75	75	75		4	13
			23	4		√		30	√			14.3.20	14.9.20	78	78	79	78	78	78	75	78		3.5	11.5
			34	4		√		35		√		14.3.20	14.9.20	66		67	67	66		67	67		4	9.5
			36	4		√		15			√	14.3.20	14.9.20	76		72	76	72		72	76		4	9.5
135	√		46	3		√		35			√	13.9.5	13.10.19	83	85	84	85	85	85	88	85	yes	5	11.5
136	√		16	3		√		10			√	12.12.7	13.4.12	74		71	71	81		79	81		4	9.5
			15	3		√		10		√		12.12.7	13.4.12	75		71	71	83		80	80		4	9.5
			11	3		√		30	√			13.7.18	13.11.2	69	70	65	69	77	77	77	78		4	13
137		√	46	3	√			35			√	15.3.28	15.12.17	75	75	65	75	82		82	82		4	9.5
			36	3		√		50			√	15.3.28	15.12.17	79		69	79	78		78	78		4	9.5
138	√		46	4		√		50			√	15.3.21	15.7.4	82		85	82	81		80	81		5	9.5
			45	4	√			10		√		15.3.21	15.7.4	58	67	67	67	76		78	76		4.5	9.5
			11	4	√			50	√			15.7.4	15.12.12	60		64	64		70	70	70		4	13
			12	4		√		15	√			15.7.4	15.12.12	67		65	67	76	76	76	74		3.5	13
			36	4		√		30			√	15.10.5	16.4.5	76		76	76						4	9.5
139	√		44	2		√		50		√		15.7.1	15.8.26		80	74	75		74	73	74		4	11.5
			46	2		√		50			√	15.7.1	15.8.26	80		77	77	85		81	81		4.5	11.5
140		√	25	3	√			15		√		15.5.13	15.8.18	58		59	63	75	75	75	75		4	9.5
			26	3	√			15			√	15.5.13	15.8.18	62		57	57	75		74	75		4.5	9.5
141		√	34	1	√			50		√		15.5.8	15.8.23	75		75	75	76		72	72		4.5	9.5
			36	4		√		25			√	15.5.8	15.8.23	71		70	72	75		75	75		4.5	7.5
142		√	36	1	√			40			√	15.3.28		70		70	70	79	79	79	79		4.5	9.5
			25	1		√		50		√		15.3.28		83	83	80	84	80	80	79	79		4	9.5
			16	1	√			50			√	15.3.28	15.6.19	77		77	77	78		75	78		4.5	9.5
143	√		46	1	√			50			√	15.5.12	15.6.19	77	83	83	83					yes	4.5	9.5
			43	1	√			50	√			15.5.13	15.6.19	82	82	78	78	82		79	81	yes	4	13
			41	1	√			50	√			15.5.14	15.6.19	75	75	75	76	75	75		75	yes	4	13
			35	1	√			50		√		15.5.15	15.6.19	75		80	79	78		80	79	yes	4	9.5
			37	1	√			50			√	15.5.16	15.6.19	82		79	81	82		79	81	yes	4.5	9.5
			47	1	√			50			√	15.5.17	15.6.19	75		77	75	75	75		75	yes	4.5	7.5
144		√	43	2	√			25	√			15.10.16	15.12.17	71	71	69	69	70		67	67	yes	4	13
			44	2	√			45		√		15.10.16	15.12.17	75	75	71	71	75	75		75	yes	4	11.5
			47	2		√		30			√	15.10.16	15.12.17	79		80	79	73		75	75	yes	4.5	11.5
145		√	11	1	√			50	√			15.5.13	15.7.17	80	80	80	80	81	81	81	81	yes	4	13
			21	1	√			50	√			15.5.13	15.7.17	77	77	77	77	78	78	74	78	yes	4	13
146		√	36	4		√		50			√	15.7.17	15.9.3	85		85	85	77		80	80	yes	4.5	9.5
147		√	36	4		√		50				15.6.3	15.9.23	76		72	76	79		80	80	yes	4	9.5
148	√		15	2	√			50		√		15.4.2	15.5.22	80	80	80	80		74	74	74	yes	4.5	11.5
			17	1		√		45			√	15.4.2	15.5.22	77		76	75	77	77	78	77	yes	4.5	11.5
149	√		12	2		√	yes	20	√			15.3.20	15.12.14	74	73	74	72	76	76	76	76	yes	3.5	13
			22	1		√		50	√			15.3.20	15.12.14	75	75	74	73	80	80	80	76	yes	3.5	11.5
150	√		26	2	√			25			√	15.5.29	15.9.9	74		74	74	82		82	82	yes	5	11.5
151		√	25	2	√			50		√		15.6.18		79		79	79	74	74	63	74		4.5	11.5
			22	2		√	yes	50	√			15.6.18		79	79	79	80	82	82	82			4	13
152	√		26	2		√		50			√	14.10.8	15.5.9					85		85	85		4.5	9.5
			46	1	√			50			√	15.10.31	16.1.3		78	77	79	78	78	77	77		4.5	9.5
			47	3		√		50			√	15.10.31	16.1.3		81	80	80	67	67	64	64		4.5	9.5
153	√		31	1		√		50	√			15.1.31	15.4.30	73	73	70		73	75	73	73		4	13
			33	1		√		50	√			15.1.31	15.4.30	73	73	73	72	77	77	78	76		4	13
			36	1		√		50			√	15.8.31	15.10.15		75	72	72	79	78	80	80		4.5	11.5
154	√		46	1		√		50			√	15.1.21	15.4.23	73		73	73	77		77	77		4.5	7.5
			31	1		√		50	√			15.1.21	15.4.23	78	79	75	79	78	78	74	74		4	11.5
			41	1		√		50	√			15.1.21	15.4.23	84	84	84	84	84	83	84	84		4	11.5
			43	1		√		25	√			15.1.21	15.4.23	82		79	80	81		79	80		4	13
			34	1		√		20		√		15.1.21	15.4.23	71		75	71	70	70	70	70		4	11.5
			35	1		√		30		√		15.1.21	15.4.23	70		69	71	71	71	74	73		4	9.5
			21	1		√		50	√			15.2.2	15.6.11	76	76	76	76	71	71	74	73	yes	4	9.5
			24	1		√		50		√		15.2.2	15.6.11	75	75	75	75	74	75	71	70	yes	4	9.5
155	√		34	1	√			35		√		15.10.8	15.12.31	78		78	78	74		74	74	yes	4	11.5
			33	1	√			40		√		15.10.8	15.12.31		79	79	79		76	73	73	yes	4	9.5
			43	1		√		50	√			15.10.26	15.12.31		75	75	74		70	70	70	yes	4	11.5
			44	1		√		50		√		15.10.26	15.12.31	76	75	75	75	72	72	72	72	yes	4	11.5
156	√		36	1	√			50			√	15.9.23	15.11.26	75	75	75	75	72	72	72	72	yes	4.5	11.5
157		√	14	3		√		35		√		15.9.12	15.11.7	79		79		72	72	69	72	yes	3.5	11.5
158	√		46	1		√		50			√	15.9.6	15.11.4	70	70	67	67	75	75	75	75	yes	4	9.5
			14	2	√			30		√		15.9.6	15.11.4	77		71	71	77	77	76	77	yes	4	9.5
159	√		44	3		√		50		√		15.4.13		76		76	76	79	79	79	79		4	11.5
			46	3		√		30			√	15.4.13		70		80	80	83		84	83		5	9.5
			26	3		√		20			√	15.4.13		78		71	71	78		75	76		4.5	9.5
			34	3		√		50		√		15.4.13			77	74	75	81	84	81	82		4	11.5
			36	3		√		50			√	15.4.13		81		85	80	71		81	81		4	9.5
160	√		32	1	√			50	√			15.6.20	15.10.9	80	84	84	82	80	84	84	82		4	13
161		√	11	3	√			35	√			15.3.25	15.7.15	74		74	71	74	63	74	74		4	13
162	√		36	2	√			50			√	15.3.27	15.6.11	81		82	82	80		84	81		4.5	9.5
			37	2	√			30			√	15.3.27	15.6.11	82		82	80	82		75	82		4.5	9.5
			45	2	√			35		√		15.7.1	16.4.5	81		81	81	76		81	81	yes	4	11.5
			47	2		√		50			√	15.7.1	16.4.6	80		81	81	81		81	81	yes	4.5	11.5
163	√		46	4		√		50			√	15.8.27	15.11.18	80		75	75	80		82	82	yes	4.5	9.5
			36	4		√		35			√	15.8.27	15.11.18	84		81	75	80		80	80	yes	4.5	9.5
164		√	47	3		√		15			√	15.8.19	16.5.4	64		74	74	76	78		75		4.5	9.5
165	√		31	4	√			50	√			15.6.13	15.8.15	76		75	76	69	69	69	69		3.5	13
166	√		46	1		√		50			√	15.6.18	16.2.10	80		80	80	81	78		75	yes	3.5	13
167	√		37	2		√		30			√	15.5.27	15.7.15	82		82	83	81		78	81	yes	4.5	9.5
168		√	41			√	yes	50	√			15.8.22		72	72	64						yes	3.5	13
169		√	43	2		√		50	√			15.4.15	15.7.27	80	80	81	80	85	85	85	85		4	11.5
			41	1		√		50	√			15.4.15	15.7.27	80	80	72	79	75	75	79	80		4	11.5
			31	1		√		40	√			15.4.15	15.7.27	78	78	72	78	84	84	78	84		4	11.5
			33	2		√		40	√			15.4.15	15.7.27	80	80	73	80	71	80	80	71		4	11.5
			36	2		√		40			√	15.4.15	15.7.27	80	73	73	78	74	80	80	74		4	7.5
170		√	42			√		50	√			15.9.17	16.3.20	75	75	75	70	76	78		75	yes	4	13
			44			√		50		√		15.9.17	16.3.20	69	68	70	70	76	78		75	yes	4	13
			32			√		50	√			15.9.17	16.3.20	68	68	78	78	76	78		75	yes	4	13
			34			√		35		√		15.9.17	16.3.20	78	78	77	78	76	78		75	yes	4	13
171	√		44	1	√			50		√		15.4.3	15.6.4	75		70	80	75	75	75	75	yes	4.5	11.5
			31	1	√			35	√			15.4.3	15.6.4	80		79	81		79	81	79	yes	4	11.5
			42	1	√			50	√			15.4.3	15.6.4	80	80	80		78	78	75	75	yes	4	13
172		√	11	1	√		yes	50	√			15.3.4		66	70	66	70	76	78		75		4	13
173		√	14	4		√		50		√		15.5.8	15.8.21	80		80	80	81		81	81		4	11.5
			16	4		√		35			√	15.5.8	15.8.21	73		79	79	75		72	72		4	11.5
174		√	31	2	√			40	√			15.2.26	15.6.15	75	75	68	75	74	74	63	73		3.5	13
175		√	46	3		√		35			√	15.5.6	15.9.11	80		66	66	79	79	80	79		4.5	9.5
176	√		16	2	√			50			√	15.10.24		76	76	76	76	76	78		75		4.5	11.5
177	√		41	1	√		yes	50	√			14.5.3	14.8.21	70		64	73	77		77	77		3.5	13
			32	1	√		yes	35	√			14.5.3	14.8.21	73		62	62	70		75	75		3.5	13
Failured patient/two implants
1			14
			15

## Sheet: database for group2
number of patient	sex	age	tooth location	bone type	immediate(1)	bone graft	torque	T1 time point	T2 time point	ISQ 1				ISQ 2				I stage	implant
										M	D	B	L	M	D	B	L		diameter(mm)	length(mm)
1	1	50	2	2	1	1	40	2015.9.7	2016.1.27	72	73	74		80	79	78		yes	4	9.5
		50	2	2	1	1	40	2015.9.7	2016.1.27	74	74	75		82	81	80		yes	4	9.5
2	2	21	1	4	1	1	10	2015.9.7	2016.1.22	53	54	55		74	72	70		no	4	9.5
3	2	45	1	2	2	1	5	2015.9.3	2016.1.14	53	58	59	58	75	75	65	65	no	4	14.5
		45	2	2	2	1	35	2015.7.1	2015.10.3	75		77	76	82		82	81	yes	4	9.5
4	2	51	2	2	1	1	20	2015.7.27	2015.11.30	67		63		72	72	67	72	no	3.5	11.5
		51	1	4	1	1	40	2015.7.27	2015.10.25	78	78	78	78	84	84	84	84	yes	4	9.5
5	1	51	1	1	2	1	45	2014.12.8	2015.2.28	73	73	72	72	75	75	75	75	yes	3.5	13
6	1	25	2	2	2	1	40	2015.8.8	2015.11.8	76	76	76	76	80	80	80	80	yes	4	9.5
7	1	48	1	1	2	2	40	2014.4.11	2014.12.4	70	70	70	70	69		73	74	yes	4	13
		48	1	2	2	2	50	2014.4.11	2014.12.4	76		73	73	84	84	74	74	yes	4	11.5
8	1	61	2	2	2	1	30	2015.8.28	2015.10.28		79	72			80	80		yes	4	11.5
9	1	48	2	2	1	1	40	2013.9.7	2014.1.12	85	85	84	85	86	86	86	86	yes	4	9.5
10	2	47	2	1	1	1	40	2015.6.22	2015.11.8	74	74	72	72	80	80	81	81	yes	4	11.5
11	1	59	2	2	1	1	35	2014.7.17	2014.10.23	74		75	74	77		77	75	yes	4	9.5
		59	2	2	2	1	35	2014.7.17	2014.10.23	78		78	77	81		81	80	yes	4	9.5
12	2	53	2	2	2	1	30	2015.6.4	2015.8.18	79			70	71	71	72	72	yes	4	9.5
		53	2	2	2	1	30	2015.6.4	2015.8.18	81		79	81	75	75	75	75	yes	4	9.5
13	1	52	1	3	2	1	30	2015.6.3	2015.12.13	77		82	77	80		82	82	no	4	9.5
		52	2	2	2	1	40	2015.6.3	2015.12.13	78	78	75	75	80	80	78	78	no	5	7.5
14	2	29	1	2	1	2	30	2015.8.28	2015.10.17	70	72	77	75	82	82	85	82	no	4	9.5
15	2	50	2	2	2	1	40	2015.5.26	2016.1.16			70	70			75	80	yes	4	9.5
16	2	26	1	3	2	1	20	2015.5.25	2015.10.5	68	68	68		80	80	80		yes	4	9.5
17	2	40	2	2	2	1	30	2015.10.19	2016.2.14	76	76	76	76	80	80	80	80	yes	5	7.5
18	2	56	2	2	1	2	40	2015.10.14	2016.2.16	75	73	72		80	80	80		yes	4	11.5
		56	2	2	2	1	40	2015.10.14	2016.2.16	81	78		75	82	82		82	yes	4	9.5
19	2	34	2	2	1	1	35	2015.10.10	2016.5.11	77		77	77	85			84	yes	4	11.5
20	2	33	2	1	1	2	50	2015.10.4	2016.1.14		78	78	78	68	68	68	68	yes	4	9.5
		33	2	1	1	1	50	2015.10.4	2016.1.14	50		70	70	73		73		yes	5	7.5
21	2	26	1	2	1	1	50	2015.10.4	2016.2.17	79	79	72	72	82	81	82	82	yes	5	9.5
22	2	37	2	3	2	1	25	2015.9.30	2016.1.20	80		80	80	79	79	79		yes	4	9.5
23	1	37	2	2	2	1	35	2015.8.28	2016.5.31	75	78	79		80	81	82		yes	4	9.5
		37	2	3	2	1	10	2015.8.28	22016.5.31	75	75	75		80	80	80		no	4	9.5
24	2	54	2	2	2	1	35	2015.9.23	2016.3.10	81		81	81	83		83	83	yes	4	11.5
		54	2	2	2	1	35	2015.9.23	2016.3.10	82			82	83			83	yes	4	9.5
25	2	28	1	2	2	2	15	2015.9.21	2016.1.27	67	67	67		75	75	75		no	3.5	13
26	1	41	2	2	2	1	35	2015.9.19	2016.1.20	77	77	77		84	82	81		yes	4	9.5
27	2	48	1	2	2	1	40	2015.9.14	2016.1.25	79	82	84		82	83	84		yes	4	9.5
		48	2	2	2	1	20	2015.9.14	2016.1.25	84	83	83		84	83	83		yes	4	9.5
28	1	49	2	2	1	1	25	2015.9.12	2016.1.15	77	77	85		82	82	82	82	yes	4	11.5
29	2	22	2	2	2	1	20	2015.9.9	2016.1.23	72		70	72	76	76	76	76	yes	4	9.5
30	1	52	1	1	1	2	20	2013.12.12	2014.10.6	70	67	69	68	75	75	70	70	yes	3.5	13
31	1	75	1	4	1	1	15	2012.3.10	2012.7.8		70	70	70	74	74	74	74	no	4	11.5
32	2	46	2	1	1	1	15	2014.12.20	2015.4.2	72	72	72	71	72	75	72	75	no	4	9.5
		46	2	1	1	1	10	2014.12.20	2015.4.2	84	84	84	84	80	78	80	78	no	4	9.5
33	2	46	2	1	1	1	35	2012.2.17	2012.6.17	77	77	78		80	80	77	77	yes	4	9.5
34	1	25	1	1	1	1	45	2014.3.7	2014.9.26	70	70	70	70	77	77	73	74	yes	3.5	11.5
35	2	48	1	1	1	2	30	2014.2.28	2014.8.23	77		77	74	75	75	71	71	yes	4	13
36	1	33	1	1	2	1	30	2014.2.19	2014.8.8	77	77	78	78	73	73	74	74	yes	4	9.5
37	1	65	2	1	2	1	60	2014.2.18	2014.9.20	81	81	67	67	76	76	76		yes	4	11.5
		65	2	1	2	1	60	2014.2.18	2014.9.20	85		83	85	87		82		yes	4	9.5
		65	2	1	2	1	50	2014.2	2014.9.20	85		85	85	85	85	85		yes	4	9.5
38	2	28	1	2	2	2	30	2014.2.17	2014.7.24	65	65	65	65	72	72	70	68	yes	3.5	13
39	1	64	1	2	2	2	30	2014.5.31	2014.10.4	75	75	65	65	78	78	74	77	yes	4	11.5
40	1	39	1	2	2	2	45	2014.5.13	2014.10.21	70	70	66	66	70	70	66	66	yes	4	13
		39	2	2	2	1	35	2012.5.13	2012.8.11	80	81	80		80	84	81	84	yes	4	9.5
41	2	33	1	2	1	2	30	2014.4.8	2014.9.17	62	62	60	60	74	74	70	73	no	4	13
		33	1	2	1	2	30	2014.4.8	2014.9.17	60	60	60	60	75	75	71	72	no	3.5	13
42	2	36	2	4	1	2	20	2014.2.10	2014.9.6	70		70	70	81	81	81	81	no	4	9.5
43	1	59	1	3	1	2	30	2014.1.22	2014.8.29	64	64	64	64	74	74	75	72	yes	4	13
44	2	45	2	2	1	1	50	2014.1.19	2014.3.19	72		72	72	80		80	80	yes	4	9.5
		45	2	2	1	1	50	2014.1.19	2014.3.19	82		82	80	81		81	80	yes	4	9.5
45	2	39	2	2	2	1	35	2014.1.14	2014.3.14	78		79	79	72	70	70	70	yes	3.5	11.5
		39	2	2	2	1	35	2014.1.14	2014.3.14	79		77	79	75	72	72	72	yes	3.5	11.5
46	1	65	1	2	2	1	35	2014.1.9	2014.3.20	81	81	78	81	70	70	70	70	yes	3.5	13
47	1	52	2	2	2	1	40	2014.10.5	2015.1.23	73	73	73	73	75	78	79	78	yes	4	11.5
		52	2	2	2	1	40	2014.10.5	2015.1.23	80	80	80	80	84	84	84	84	yes	4	11.5
		52	2	3	2	1	35	2014.10.5	2015.1.23	67	67	68	68	74	74	65	65	yes	4	11.5
48	2	29	2	3	2	1	25	2014.9.17	2014.12.24	82	82	84	81	80	80	82	82	yes	4	11.5
49	2	44	2	1	2	1	40	2014.9.10	2014.12.17	80	80	80	80	80	80	80	80	yes	4	9.5
50	2	37	2	2	2	1	30	2013.11.23	2014.9.6	65		58	58	75		75	75	yes	3.5	9.5
51	1	27	2	2	1	1	30	2014.9.1	2012.3.7	73	74	74	74	80	80	80	80	yes	4	11.5
52	1	54	1	3	2	1	35	2014.8.20	204.12.8	81	81	78	81	76	76	76	76	yes	4	13
		54	1	2	2	1	35	2014.8.20	2014.12.8	78	78	78	78	81	81	78	82	yes	4	13
53	2	34	2	2	1	1	30	2014.8.18	2014.12.1	75	75	75	75	80	80	80	80	yes	4	9.5
		34	2	2	1	1	30	2014.8.18	2014.12.1	78	78	78	78	81	81	80	80	yes	4	9.5
54	2	20	1	4	2	1	5	2014.8.8	2015.1.19	48	44	46	44	80		78	80	no	4	9.5
55	2	32	1	2	2	1	30	2014.8.5	2014.12.24	79	78	79	79	73	73	65	65	yes	3.5	13
56	1	37	2	2	2	1	30	2014.8.1	2014.11.15	71	79	71	70	80	80	80	80	yes	4	11.5
57	1	66	2	1	1	1	50	2014.3.28	2014.7.24	75	75	75	75	73		72	72	yes	4	11.5
		66	2	2	2	2	30	2014.7.30	2014.12.22	72	72	80	72	81	81	80	80	yes	5	7.5
58	1	46	1	2	2	2	40	2014.7.23	2014.12.18	73	74	69	69	75	75	73	73	yes	4	13
59	1	51	2	2	2	1	30	2012.5.11	2012.8.11	80		80		80	84	81	84	no	4	9.5
60	2	57	2	3	2	1	30	2015.7.1	2015.10.3	75		77		82		82		yes	4	9.5
61	2	56	1	2	1	1	25	2013.10.17	2014.1.21	84	83	85	85	85	85	84	84	yes	4	11.5
62	2	55	1	3	2	1	50	2013.11.27	2014.5.7	80		76	80	82		80	80	yes	4	9.5
63	2	55	2	2	1	2	30	2013.12.3	2014.3.6	72		76	76	75	70		74	no	4	9.5
		55	2	3	2	1	30	2013.12.4	2014.3.7	74		75	74	78	78	76	76	no	4	9.5
64	1	52	1	3	1	2	20	2013.12.12	2014.10.6	70	67	69	68	75	75	70	70	no	4	11.5
65	1	63	2	2	2	1	30	2015.7.20	2012.1.27	85			85	84	84	82	82	yes	5	7.5
		63	2	2	1	1	25	2012.1.27	2012.5.13	71	71	77	77	74	74	74	74	yes	4	9.5
66	2	34	2	2	1	1	30	2012.8.18	2012.12.1	75	75	75	75	81	80	80	80	yes	4	9.5
		34	2	2	1	1	30	2014.8.18	2014.12.1	78	78	78	78	81	80	80	80	yes	4	11.5
67	2	20	1	4	2	1	5	2014.8.8	2015.1.19	55	44	66	44	80		78	80	no	4	9.5
68	2	32	1	3	2	1	30	2014.8.5	2014.12.24	79	78	79	79	73	73	65	65	yes	3.5	13
69	1	37	2	3	2	1	30	2014.8.1	2014.11.15	71	79	71	70	80	80	80	80	yes	3.5	11.5
70	1	66	2	2	1	1	50	2014.3.28	2014.7.24	75	74	75	76	73		72	72	yes	3.5	13
		66	2	2	2	2	30	2014.7.30	2014.12.22	72	73	80	72	81	80	80	80	yes	4	7.5
71	1	28	1	2	2	2	40	2014.7.23	2014.12.18	73	74	69	69	75	75	73	73	yes	3.5	13
72	1	51	2	1	2	1	35	2012.5.11	2012.8.11	80	79	80		80	84	81	84	no	4	11.5
73	2	57	2	1	2	1	35	2015.7.1	2015.10.3	75	76	77		82	81	82		yes	4	11.5
74	2	56	1	1	1	1	25	2013.10.17	2014.1.21	84	83	85	85	85	85	84	84	yes	4	11.5
75	2	46	1	2	2	1	50	2013.11.27	2014.5.7	80		76	80	82		80	80	yes	4	11.5
76	2	45	2	4	1	2	35	2013.12.3	2014.3.6	72		76	76	75	70		74	no	4	9.5
		45	2	2	2	1	35	2013.12.4	2014.3.7	74		75	74	78	78	76	76	yes	4	11.5
77	1	52	1	1	1	2	20	2013.12.12	2014.10.6	70	67	69	68	75	75	70	70	no	3.5	13
78	1	56	2	2	2	1	36	2015.7.20	2016.1.27	85	85		85	84	84	82	82	yes	4	11.5
		56	2	2	1	1	25	2012.1.27	2012.4.13	71	71	77	77	74	74	74	74	yes	4	11.5
79	2	27	1	4	2	2	40	2014.7.23	2014.12.18	73	74	69	69	75	75	73	73	yes	3.5	13
80	2	65	2	2	2	1	35	2012.5.11	2012.8.11	80		80		80	84	81	84	yes	4	9.5
81	1	50	2	2	2	1	30	2012.3.10	2012.4.30	75	76	77		82	82	82		yes	4	11.5
		53	2	2	2	1	35	2015.3.10	2015.7.8	85		85	85	84	84	82	82	yes	4	9.5
		53	1	3	1	1	35	2015.7.1	2015.10.3		76	76	76	76	76	75	75	no	4	11.5
			maxilla 1		immediate(1)
			mandibular 2		delayed 2
1 implant failure

## Sheet: database for group3
patient number	male	age	teeth location	bone type	immediate	bone graft(g)	insertio torque	T1 time point	T2 time		ISQ1				ISQ2				I stage	implant
											m	d	b	l	m	d	b	l		diameter	length
1	m	55	44	3	2		40	2015.05.25	2015.11.09	5.5	63	63	70	70	75	75	80		yes	4.5	8.5
2	f	45	17	4	2		20	2015.05.24	2015.10.27	5	60	60	60	64	78	77	78	78	yes	5	10
3	f	40	36	2	2		45	2015.5.06	2015.10.17	5	84	84	80	84	85	85	85	85	yes	4.5	10
4	f	26	46	2	2		30	2015.5.14	2015.9.12	4	80	80	80	82	80	80	80	80	yes	4.5	10
5	m	71	14	3	2	0.25	40	2015.5.12	2015.9.22	4	80	80	77	77	85	85	85	85	no	5	10
		71	16	4	2		45	2015.5.12	2015.9.22	4	80	80	77	77	85	85	81	81	no	5	10
6	f	44	46	2	2		30	2015.5.12	2015.9.28	4.5	68	68	84	84	85	85	86	86	no	4.5	8.5
7	f	45	47	2	2		35	2015.5.12	2015.9.28	4.5	71	71	71	71	85	85	86	85	no	5	10
		45	44	2	2		40	2015.5.12	2015.9.28	4.5	70	70	84	84	85	85	85	85	no	4.5	10
8	f	50	15	2	2		30	2015.5.12	2015.10.27	5.5	82	82	80	80	84	86	87	87	yes	4.5	10
		50	16	2	2		40	2015.5.12	2015.10.27	5.5	80	80	82	80	84	85	85	85	yes	4.5	8.5
9	m	47	16	2	2		30	2015.5.8	2015.12.25	7.5	78	78	72	72	84	84	77	77	yes	5	8.5
10	m	42	32	1	1	0.25	40	2015.5.4	2015.8.10	3	79	78	71	70	75	75	75	75	no	3.7	11.5
11	m	28	21	3	1	0.25	15	2015.5.4	2015.8.6	3	65	65	60	60	75	75	74	74	no	4.2	13
12	f	68	25	4	2	0.5	40	2015.8.14	2016.4.11	8	75	75	79	79	84	84	85	85	no	4.2	11.5
		68	26	4	2	0.5	30	2015.8.14	2016.4.11	8	70	70	75	75	85	85	84	84	no	4.5	10
		68	27	4	2	0.5	10	2015.8.14	2016.4.11	8	50		50		85	80			no	4.5	10
13	f	52	11	2	1	0.25	30	2015.4.29	2015.11.1	6	65	65	65	65	75	75	75	75	yes	3.7	13
		52	21	2	1	0.25	30	2015.4.29	2015.11.1	6	70	70	70	70	75	75	75	75	yes	3.7	13
14	f	61	25	2	2		40	2015.3.25	2015.8.20	5	82	82	82	82	81	85	85	85	no	4.5	10
		61	27	2	2		40	2015.3.25	2015.8.20	5	65	65	65	65	85	85	85	85	no	4.5	10
		61	14	2	2		30	2015.4.28	2015.8.31	4	81	81	80	80	87	85	87	87	yes	4.5	10
		61	16	2	2		40	2015.4.28	2015.8.31	4	81	81	78	77	87	87	88	88	yes	4.5	10
15	f	36	47	2	2		35	2015.4.25	2015.8.29	4	70	70	70	81	75	75	75	74	no	4.5	8.5
16	m	33	26	2	2		30	2015.4.25	2015.8.24	4	70	70	70	70	85	85	82	82	no	4.5	8.5
		33	36	2	2		40	2015.4.25	2015.8.24	4	85	85	85	85	88	88	89	89	yes	4.5	10
17	m	55	47	2	2		35	2015.4.23	2015.9.9	4.5	85	84	84	85	86	86	82	82	yes	4.5	10
		55	46	2	2		40	2015.4.23	2015.9.9	4.5	84	84	85	86	85	85	85	85	yes	4.5	10
18	m	52	23	2	1	0.5	40	2015.4.21	2016.1.22	9	67	70	70		71	71	70	70	yes	4.2	13
		52	25	2	1	0.5	40	2015.4.21	2016.1.22	9	80		76	80	83	83	75	75	yes	4.5	8.5
19	f	25	22	3	2	0.25	40	2015.4.17	2015.8.6	3.5	68	77	68	68	77	77	68	68	no	3.7	11.5
20	m	44	12	2	1	0.3	20	2015.4.6	2015.8.1	4	76		75	70	80	80	80	80	no	3.7	13
		44	11	3	1	0.3	25	2015.4.6	2015.8.1	4	76	76	76	76	77	77	77	77	no	3.7	11.5
		44	13	3	1	0.3	20	2015.4.6	2015.8.1	4		65	61	61		72	72	72	no	3.7	13
21	m	62	36	2	2		40	2015.4.5	2016.6.12	2	81	81	81	81	74	74	73	73	yes	4.5	8.5
22	f	51	46	2	2		25	2015.4.1	2015.10.3	6	79	77	78	78	86	86	86	86	yes	4.5	10
		51	47	2	2		35	2015.4.1	2015.10.3	6	85		85	85	87	86	86	86	yes	4.5	10
23	m	60	16	4	2		40	2015.3.31	2015.10.17	5.5	84	84	80	80	87	87	87	82	yes	4.5	8.5
		60	17	4	2	0.25	40	2015.3.31	2015.10.17	5.5	80	80	76	76	82	82	85	85	yes	4.5	8.5
24	m	62	12	2	1	0.25	35	2015.3.29	2015.10.11	5.5	62	61	60	59	75	75	75	75	yes	3.7	11.5
		62	14	3	2		40	2015.3.29	2015.10.11	5.5	84	84	73	73	81	81	79	79	yes	4.2	10
25	m	55	26	2	2		35	2015.3.29	2015.7.21	3.5	73	73	82	82	86	86	77	77	yes	4.5	8.5
26	f	30	35	2	1		35	2015.3.23	2015.7.24	4	70	70	78	78	85	85	80	80	yes	4.5	8.5
27	f	50	47	2	2		30	2015.3.22	2015.8.20	5	64	64	82	82	82	82	82	82	yes	4.5	10
28	m	45	32	2	2		30	2015.3.22	2015.6.20	3	68	68	68	68	82	82	82	82	no	3.7	11.5
		45	41	2	2		30	2015.3.22	2015.6.20	3	66	66	65	67	84	84	84	84	no	3.7	11.5
29	f	51	44	2	1	0.25	40	2015.3.20	2015.8.14	5	80	82	80		75	75	75	75	yes	4.2	11.5
30	f	57	33	2	1	0.25	35	2014.8.1	2014.9.15	1.5	73	70	73	70	74	74	74	74	yes	4.2	13
		57	34	2	2		30	2014.8.1	2014.11.6	3	72	71	81	72	80	80	81	81	yes	4.2	10
		57	36	2	2		30	2014.8.1	2014.11.6	3	84	84	84	86	82	81	81	82	yes	4.5	10
31	f	50	45	1	2		40	2015.5.10	2015.9.6	4	82	82	82	82	86	86	86	86	yes	4.5	10
		50	47	1	2		40	2015.5.10	2015.9.6	4	80	80	79	79	88	88	82	82	yes	4.5	10
32	f	34	34	2	2		35	2016.1.3	2016.5.21	4.5	80	80	80	80	85	85	85	85	yes	4.5	10
		34	36	1	2		40	2016.1.3	2016.5.21	4.5	83	83	84	84	87	87	87	87	yes	4.5	10
33	m	61	34	2	2		35	2015.10.13	2016.4.16	6	81	81	84	84	85	85	83	83	yes	4.2	10
		61	37	2	2		40	2015.10.13	2016.4.16	6	80	80	80	80	83	83	83	83	yes	5	10
		61	47	2	2		25	2015.11.11	2016.4.16	5	75	75	75	75	83	83	85	83	yes	4.5	10
34	f	40	45	2	2		35	2016.3.2	2016.6.7	3	85	85	85	85	87	87	87	87	yes	4.5	10
35	m	45	35	2	1		35	2016.2.21	2016.6.7	3.5	79	80	80	80	87	87	88	86	yes	4.5	10
36	f	64	34	2	2		35	2016.2.16	2016.6.18	4	84	84	84	84	85	85	85	85	yes	4.2	11.5
		64	36	2	2		35	2016.2.16	2016.6.18	4	83	83	83	83	84	84	84	84	yes	4.5	10
37	f	35	26	4	2		15	2016.2.1	2016.6.9	4	52	52	64	64	80	80	80	80	no	4.5	10
38	f	40	15	2	2		40	2016.6.4	2016.10.7	4	75	75	73	73	84	84	80	80	yes	4.2	10
39	f	37	11	2	2		40	2014.6.4	2014.10.15	4	75	75	74	74	83	83	79	83	yes	4.2	13
40	m	40	11	2	2		40	2014.4.22	2014.10.8	4	69	69	69	69	74	74	74	74	no	3.7	11.5
41	f	54	11	4	2	0.25	20	2014.2.8	2014.7.8	5	79	79	77	79	77	78	79	79	yes	4.5	13
42	f	38	21	2	2	0.25	35	2014.8.16	2014.11.29	3.5	73	73	68	68	79	79	79	79	no	4.2	13
		38	22	2	2	0.25	20	2014.8.16	2014.11.29	3.5	75	74	68	68	76	76	71	71	no	3.7	13
43	m	53	31	1	1		40	2014.8.9	2015.3.12	7	73	73	72	72	77	77	76	76	no	3.7	13
		53	34	4	2		40	2014.8.9	2015.3.12	7	70	70	70	70	75	75	75		no	5	8.5
44	m	60	31	1	2		40	2014.8.7	2014.12.14	4	65	62	62	65	70	72	70	70	no	3.7	13
45	f	37	35	2	2		30	2014.8.2	2014.12.3	4	83	81	82	81	83	83	83	83	yes	4.2	10
		37	37	1	2		50	2014.8.2	2014.12.3	4	81	82	81	82	86	86	86	86	yes	5	8.5
46	m	45	46	2	2		40	2014.7.28	2015.5.14	9	80	80	80	75	86	86	89	87	yes	4.5	10
47	f	53	47	2	2		40	2014.7.9	2014.12.2	5	85	85	83	83	88	88	89	89	yes	4.2	10
		53	45	2	2		30	2014.7.9	2014.12.2	5	80	80	80	80	85	85	85	85	yes	5	8.5
48	f	34	34	4	2	0.25	20	2014.7.8	2015.1.22	6	66	66	71	71	84	84	85	85	no	3.7	10
49	m	57	12	4	2	0.25	20	2014.7.7	2014.12.27	5	74	72	74	74	81	81	78	77	no	4.2	13
50	f	58	11	4	1	0.25	15	2014.7.6	2015.1.25	6	58	58	58	58	70	70	70	70	no	3.7	11.5
		58	21	4	1	0.25	15	2014.7.6	2015.1.25	6	59	59	59	59	70	70	70	70	no	3.7	11.5
51	m	23	36	2	2		30	2014.7.2	2014.11.1	4	75	75	73	75	83	83	80	80	yes	4.5	10
52	m	62	23	3	2	0.5	30	2014.6.12	2014.9.28	3.5	72	72	70	70	75	75	72	72	yes	4.2	13
53	f	43	46	2	2	0.25	40	2014.6.15	2014.12.16	6	64	64	66	66	83	83	83	83	yes	4.2	10
		43	47	2	2	0.25	45	2014.6.15	2014.12.16	6	70	63	70	70	80	80	80	80	yes	4.5	8.5
54	f	72	26	4	2		20	2014.9.10	2015.4.10	6	80	72	72	71	80	80	80	80	no	4.5	10
		72	27	4	2		20	2014.9.10	2015.4.10	6	68	68	63	68	80	79	79	79	no	5	10
55	f	50	36	2	2		30	2014.10.8	2015.3.12	5	74	74	74	75	86	86	85	85	no	4.5	8.5
		50	37	2	2		20	2014.10.8	2015.3.12	5	66	66	66	66	82	82	85	85	no	4.5	8.5
56	m	25	16	1	1		50	2014.10.7	2015.1.23	3.5	78		76	78	80	80	75	80	yes	4.5	10
57	f	21	46	3	2		20	2014.10.4	2015.8.22	10	79	79	79	79	87	87	87	87	yes	4.2	10
58	m	46	36	1	2	0.25	40	2014.9.29	2015.9.15	12	73	56	73	73	89	89	84	84	no	4.5	8.5
59	m	46	35	1	1		40	2014.9.24	2015.4.8	7	78	78		75	65	65	83	82	yes	4.5	8.5
60	m	26	21	2	2	0.25	35	2014.9.15	2015.1.19	4	76	76	74	74	82	82	78	82	yes	4.2	13
61	m	28	11	3	1	0.5	30	2014.9.9	2014.12.20	3.5	72	71	71	71	78	78	75	75	no	4.5	13
62	m	21	11	4	1	0.25	20	2014.8.30	2015.2.13	6	62	62	64	62	68	68	68	68	yes	4.2	11.5
63	f	63	14	3	2		40	2014.8.28	2015.2.11	5.5	79	79	79	77	82	82	82	82	yes	4.2	11.5
		63	16	2	2		40	2014.8.28	2015.2.11	5.5	79	79	79	79	82	82	82	82	yes	4.5	10
		63	17	3	2		20	2014.8.28	2015.2.11	5.5	79	79	79	75	79	79	79	73	yes	4.5	10
64	f	56	45	2	1		30	2014.8.28	2015.2.11	5.5	75	75	75	75	84	85	85	85	yes	4.2	11.5
65	m	25	16	1	1		50	2012.10.7	2013.1.23	3.5	79		76	78	80	80	75	80	yes	4.5	10
66	f	56	46	3	2		20	2012.10.4	2013.8.22	10	79	78	79	79	87	87	87	87	yes	4.2	10
67	m	46	36	1	2	0.25	40	2012.9.29	2013.1.30	4	73	67	73	73	89	89	84	84	no	4.5	8.5
68	m	64	35	2	2		40	2012.9.24	2013.4.8	7	78	78		79	65	65	83	82	yes	4.5	8.5
69	m	55	21	2	2	0.25	35	2012.9.15	2013.1.19	4	76	76	75	74	82	81	78	82	no	4.2	13
70	f	28	11	3	2	0.5	30	2012.9.9	2012.12.20	3.5	72	71	70	71	78	78	75	75	no	4.5	10
71	f	62	11	4	1	0.25	20	2012.8.30	2012.12.30	4	62	67	64	62	68	68	68	68	yes	4.2	11.5
72	f	73	14	3	2		40	2014.8.28	2014.12.30	4	79	79	79	78	82	82	82	82	yes	4.2	11.5
73	f	56	17	3	2		20	2014.8.30	2014.12.30	4	79	79	79	75	79	79	79	73	yes	4.5	10
74	f	62	45	2	1		30	2014.8.24	2014.12.23	4	75	75	76	75	84	85	85	85	yes	3.7	11.5
75	f	53	16	2	2		50	2014.10.7	2015.1.23	3.5	78		77	78	80	80	75	80	yes	4.5	10
76	f	62	46	3	2		20	2014.10.4	2015.5.22	7.5	79	79	80	79	87	87	87	87	yes	4.5	10
77	f	53	31	2	2		40	2014.8.9	2015.3.12	7	73	73	75	72	77	78	76	76	no	3.7	13
		53	42	1	2		40	2014.8.9	2015.3.12	7	70	70	68	67	85	84	83	84	no	4.2	10
78	f	42	46	2	2		40	2015.5.25	2015.11.09	5.5	85			85	84			85	yes	4.5	10
		42	47	2	2		35	2014.7.29	2015.5.15	9.5	79	79	79	79	89	89	85	85	yes	4.5	10
faluire rate 2%
79	one patient two implants
